# Supplementary material for: Influence of Anion Structure on Thermal, Mechanical and CO2 Solubility Properties of UV-Cross-Linked Poly(ethylene glycol) Diacrylate Iongels
Source: Membranes (Basel). 2020 Mar 17;10(3):46. doi: 10.3390/membranes10030046 (PMC7143667; doi:10.3390/membranes10030046)

Article

# Supplementary Materials: Influence of Anion Structure on Thermal, Mechanical and CO<sub>2</sub> Solubility Properties of UV-Cross-Linked Poly(ethylene glycol) Diacrylate Ionogels

Ana P.S. Martins <sup>1,2</sup>, Asier Fdz De Añastro <sup>1</sup>, Jorge L. Olmedo-Martínez <sup>1</sup>, Ana R. Nabais <sup>3</sup>, Luísa A. Neves <sup>3</sup>, David Mecerreyes, <sup>1,4</sup> and Liliana C. Tomé <sup>1,\*</sup>

<sup>1</sup> POLYMAT, University of the Basque Country UPV/EHU, Joxe Mari Korta Center, Avda. Tolosa 72, 20018 Donostia-San Sebastian, Spain; apd.martins@campus.fct.unl.pt (A.P.S.M.); afernandezdea021@gmail.com (A.F.D.A.); jorge.olmedo.martinez@gmail.com (J.L.O.M); david.mecerreyes@ehu.es (D.M)

<sup>2</sup> Instituto de Tecnologia Química e Biológica António Xavier, Universidade Nova de Lisboa, 2780-157 Oeiras, Portugal

<sup>3</sup> LAQV-REQUIMTE, Chemistry Department, Faculdade de Ciência e Tecnologia, Universidade Nova de Lisboa, 2829-516 Caparica, Portugal; a.nabais@campus.fct.unl.pt (A.R.N); lan11892@fct.unl.pt (L.A.N)

<sup>4</sup> Ikerbasque, Basque Foundation for Science, E-48013 Bilbao, Spain

\* Correspondence: lilianasofi.carvalho@ehu.eus

Received: 4 February 2020; Accepted: 11 March 2020; Published: 17 March 2020

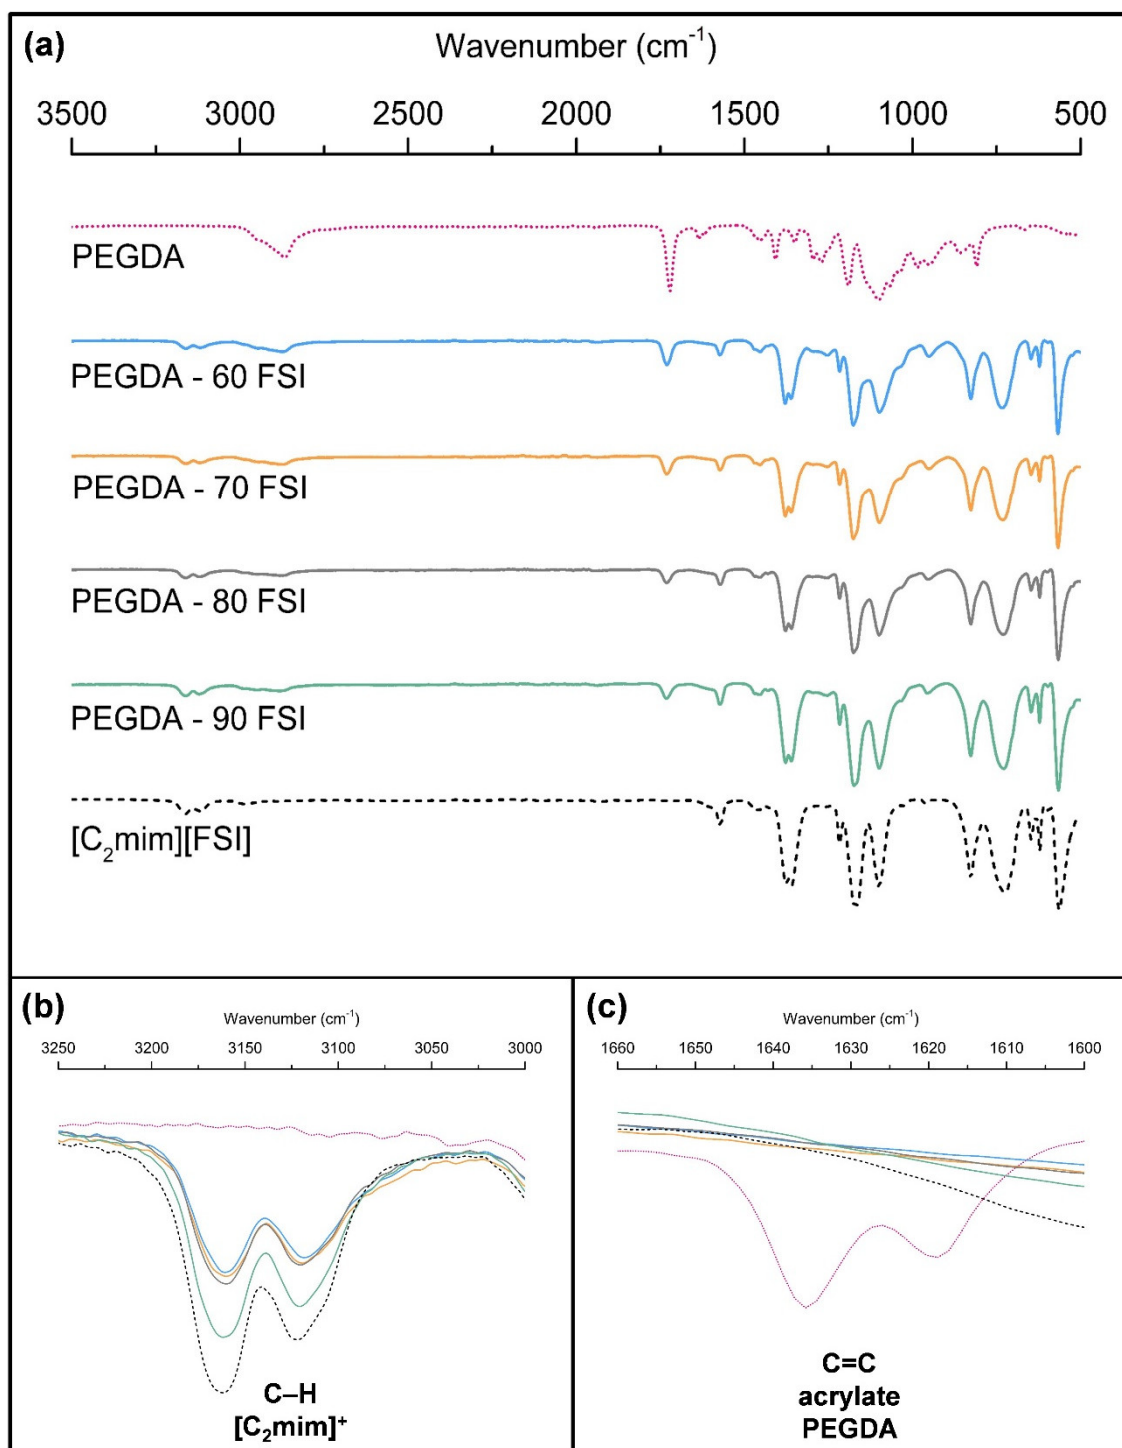

**Figure S1.** FTIR analysis of the cross-linked PEGDA iongels containing different amounts of  $[\text{C}_2\text{mim}][\text{FSI}]$ : **(a)** FTIR curves; **(b)** differences in the intensity of the absorption bands associated to the imidazole ring; and **(c)** disappearance of the characteristic absorption bands of acrylate groups.

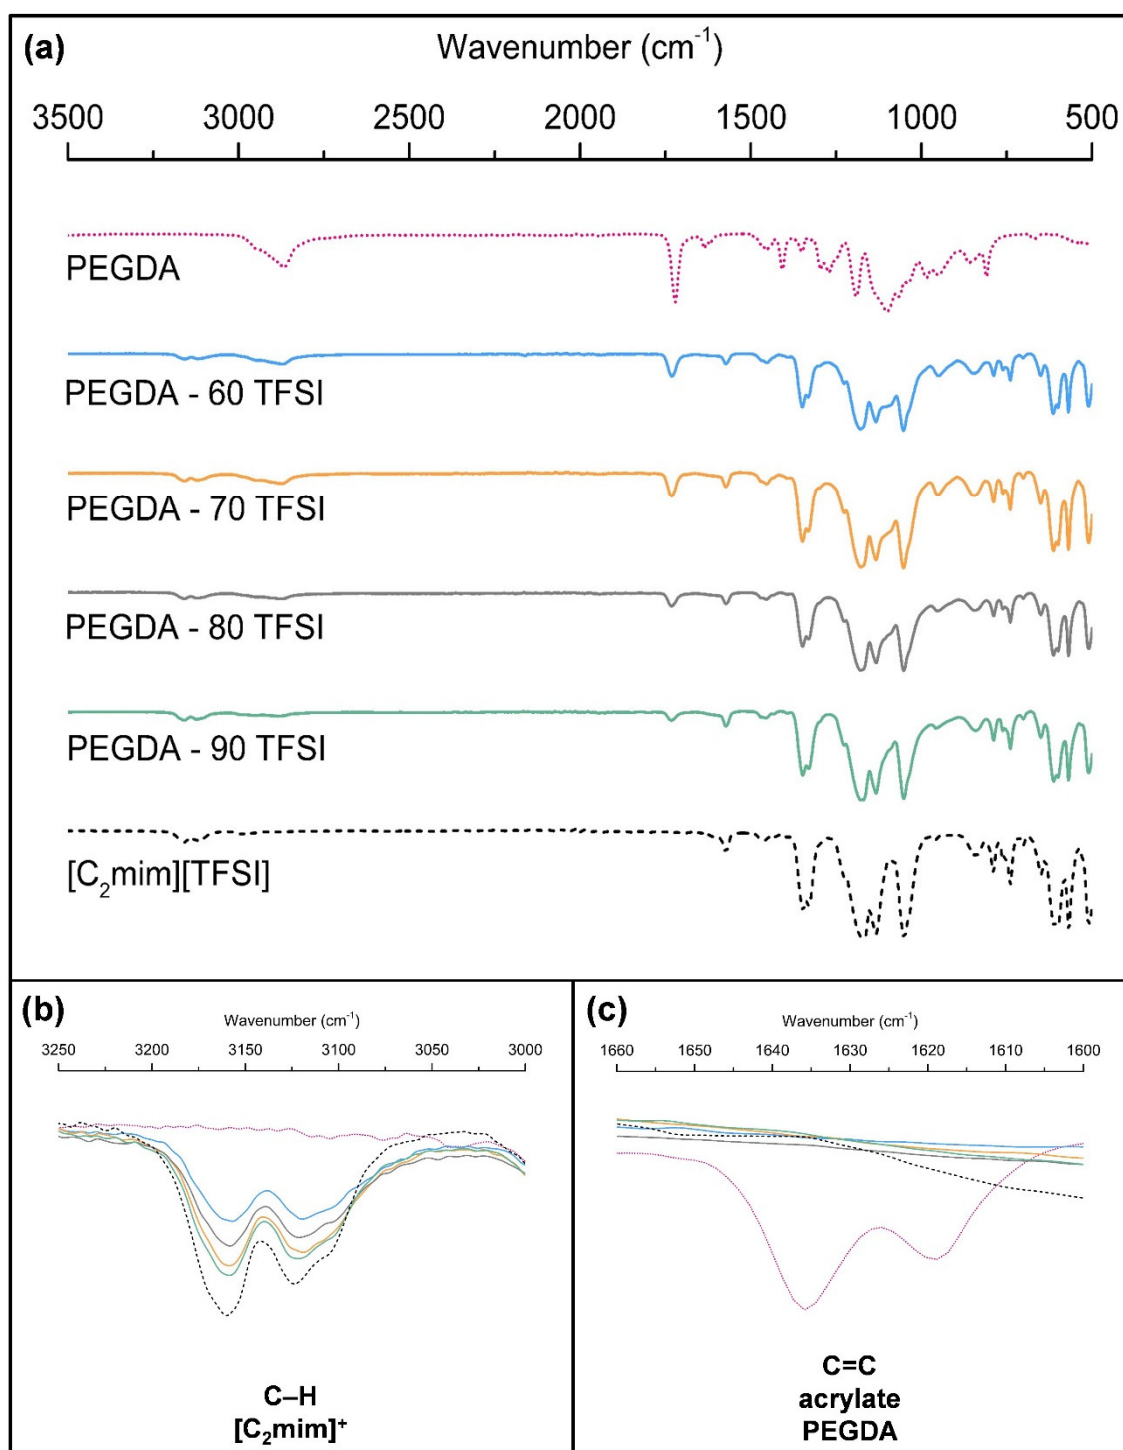

**Figure S2.** FTIR analysis of the cross-linked PEGDA iongels containing different amounts of  $[\text{C}_2\text{mim}][\text{TFSI}]$ : **(a)** FTIR curves; **(b)** differences in the intensity of the absorption bands associated to the imidazole ring; and **(c)** disappearance of the characteristic absorption bands of acrylate groups.

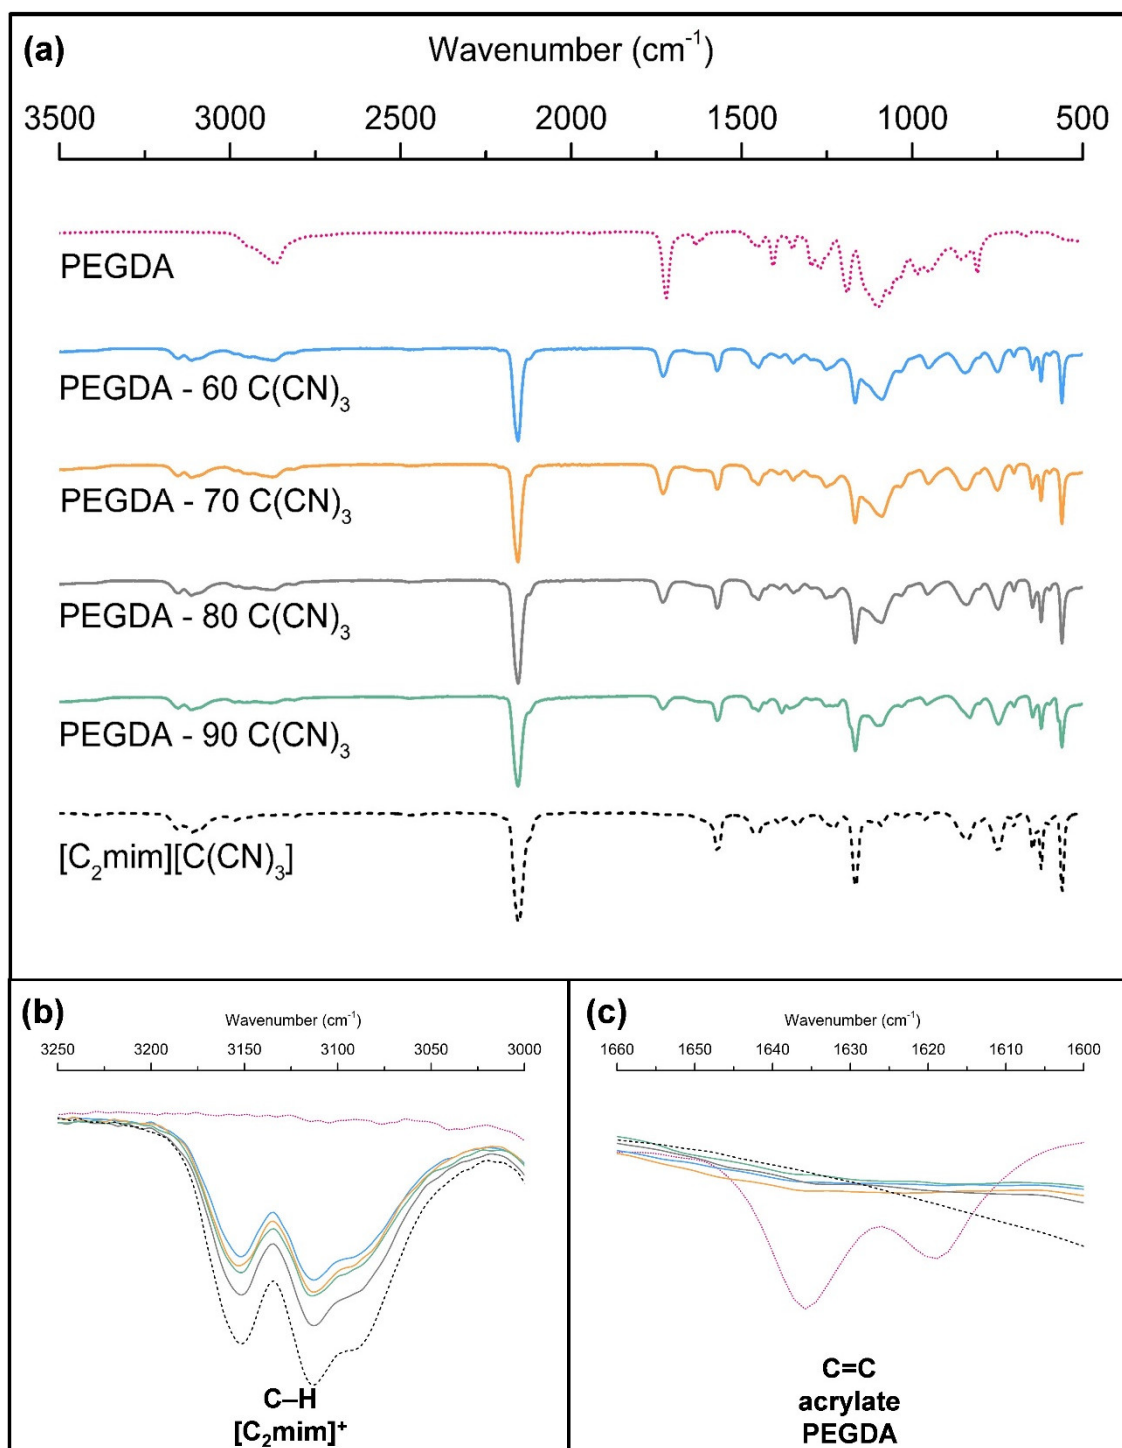

**Figure S3.** FTIR analysis of the cross-linked PEGDA iongels containing different amounts of  $[\text{C}_2\text{mim}][\text{C}(\text{CN})_3]$ : **(a)** FTIR curves; **(b)** differences in the intensity of the absorption bands associated to the imidazole ring; and **(c)** disappearance of the characteristic absorption bands of acrylate groups.

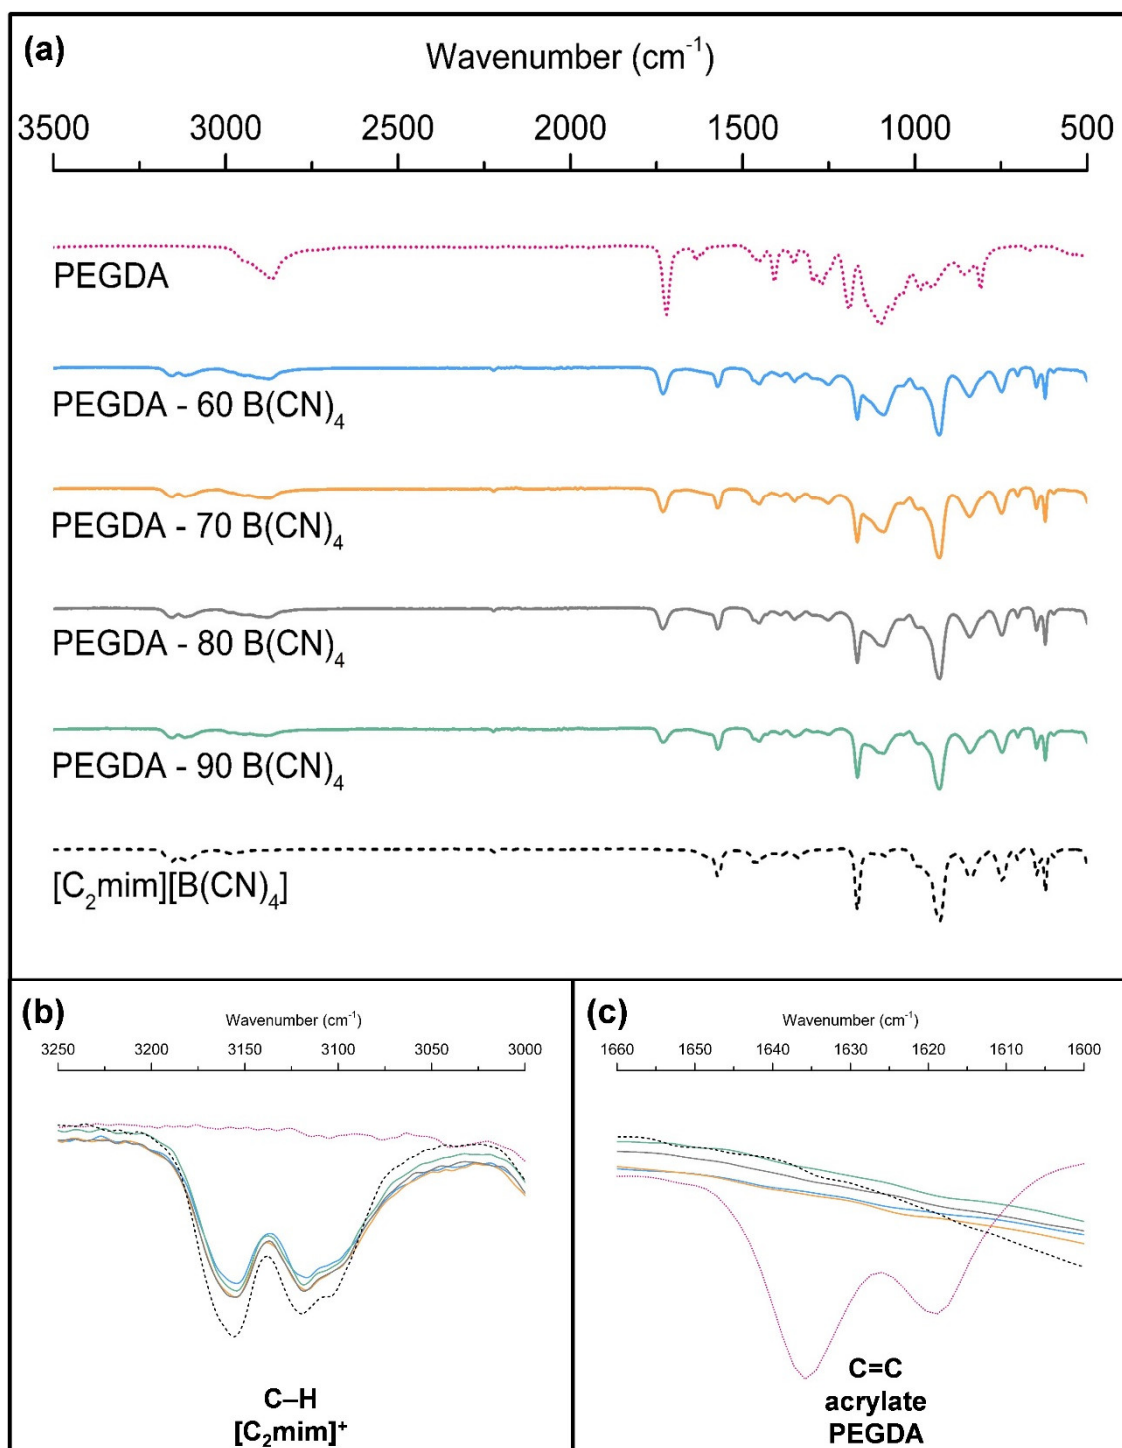

**Figure S4.** FTIR analysis of the cross-linked PEGDA iongels containing different amounts of  $[\text{C}_2\text{mim}][\text{B}(\text{CN})_4]$ : **(a)** FTIR curves; **(b)** differences in the intensity of the absorption bands associated to the imidazole ring; and **(c)** disappearance of the characteristic absorption bands of acrylate groups.

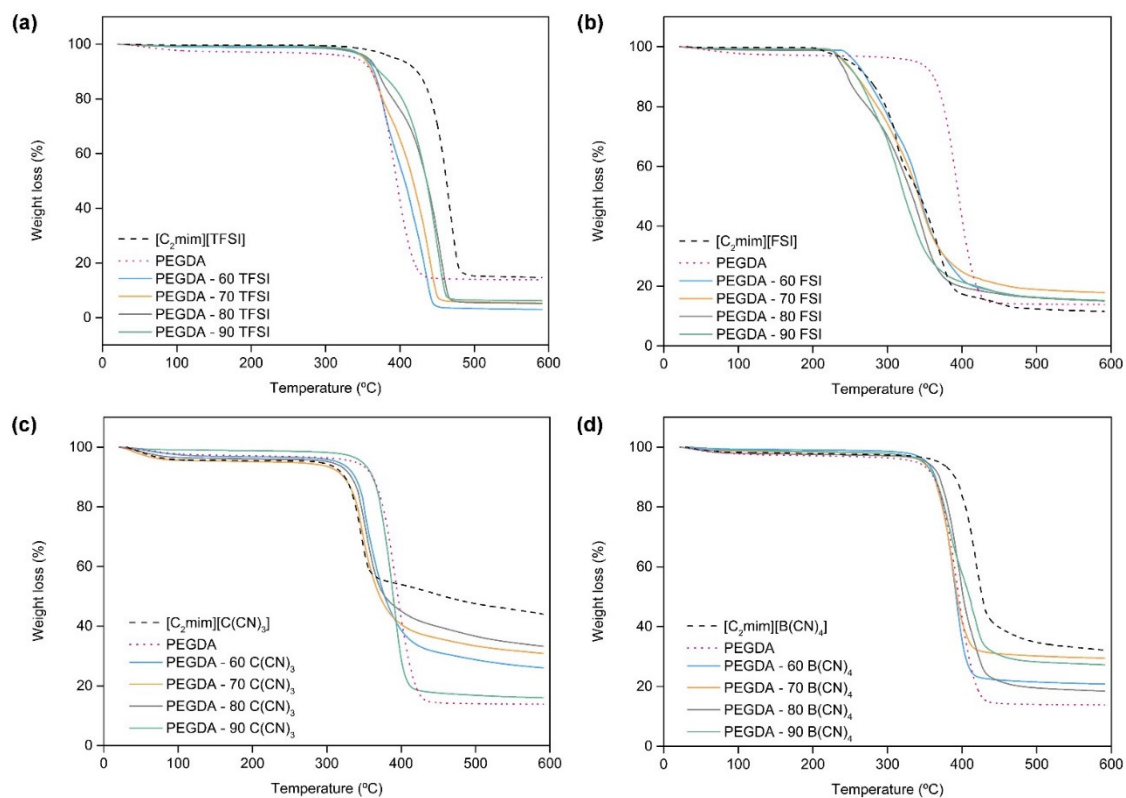

**Figure S5.** TGA thermograms of the cross-linked PEGDA iongels containing different amounts of the selected ionic liquids: (a) [C<sub>2</sub>mim][TFSI], (b) [C<sub>2</sub>mim][FSI], (c) [C<sub>2</sub>mim][C(CN)<sub>3</sub>] and (d) [C<sub>2</sub>mim][B(CN)<sub>4</sub>].

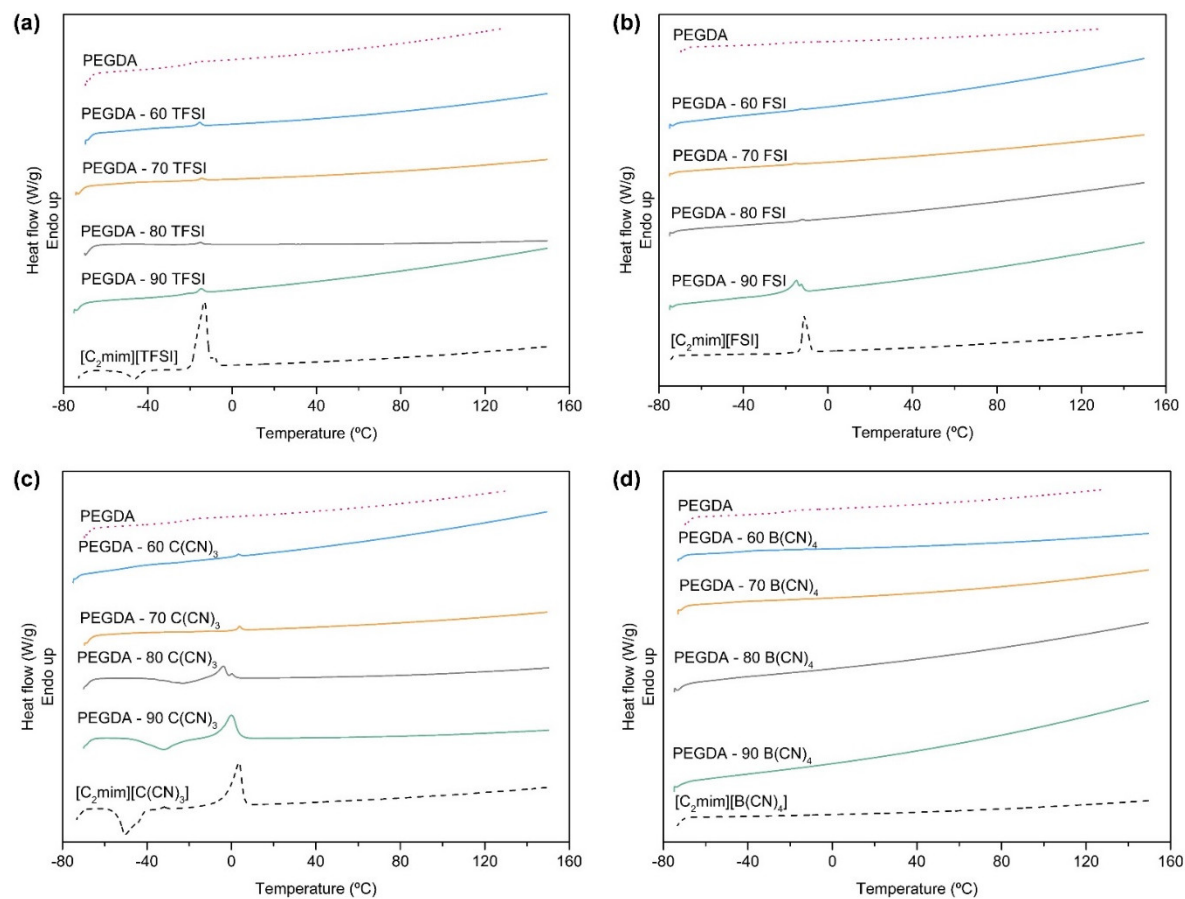

**Figure S6.** DSC curves of the cross-linked PEGDA iongels containing different amounts of the selected ionic liquids: **(a)** [C<sub>2</sub>mim][TFSI], **(b)** [C<sub>2</sub>mim][FSI], **(c)** [C<sub>2</sub>mim][C(CN)<sub>3</sub>] and **(d)** [C<sub>2</sub>mim][B(CN)<sub>4</sub>].

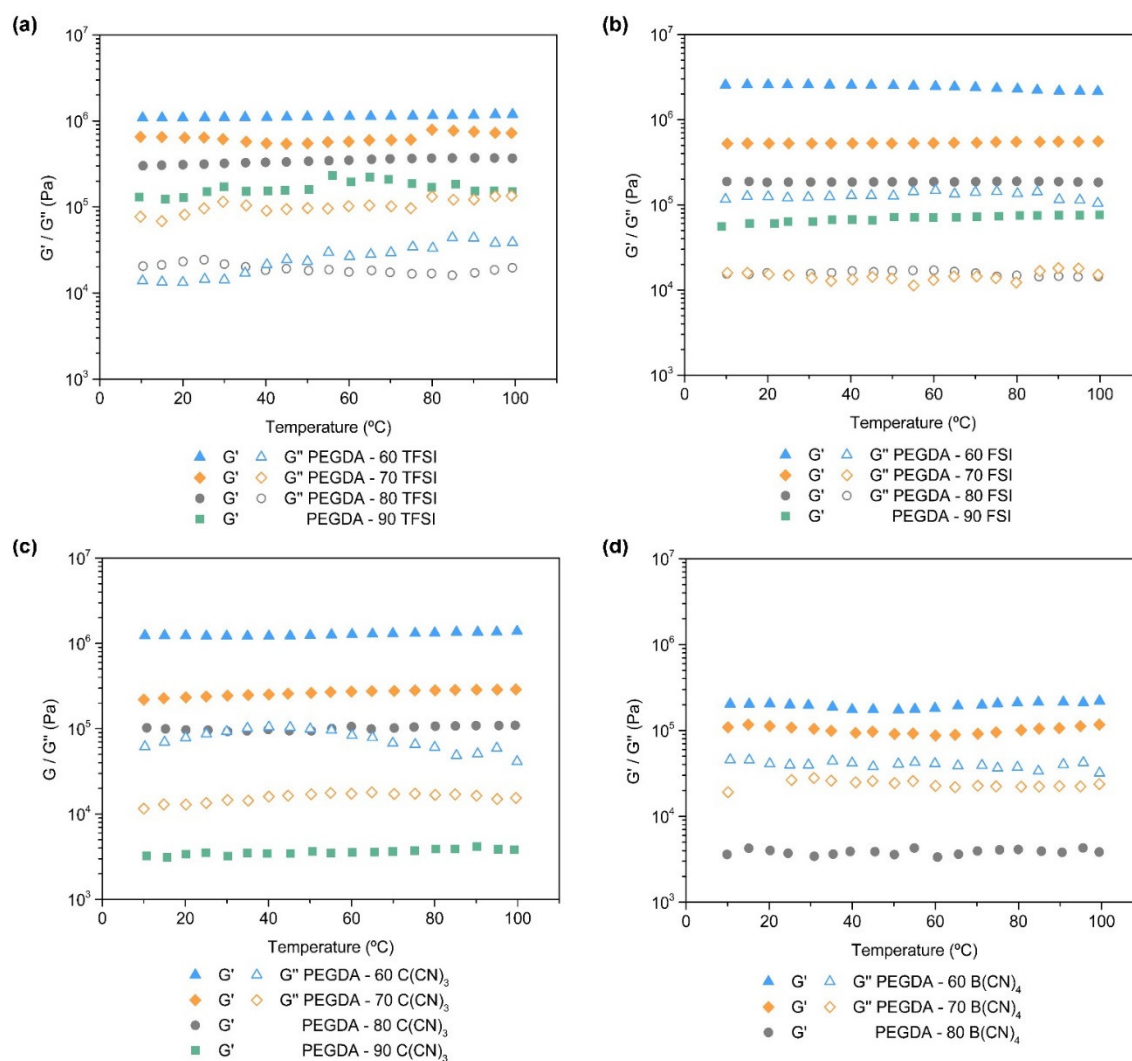

**Figure S7.** DMTA analysis of the cross-linked PEGDA iongels containing different amounts of the selected ionic liquids: (a) [C<sub>2</sub>mim][TFSI], (b) [C<sub>2</sub>mim][FSI], (c) [C<sub>2</sub>mim][C(CN)<sub>3</sub>] and (d) [C<sub>2</sub>mim][B(CN)<sub>4</sub>].

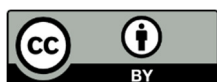

Supplement: Supplementary file 1 [file membranes-10-00046-s001.pdf]
